# Supplementary material
Source: MDPI journal article supplement (https://www.mdpi.com/2073-4395/11/12/2560)
Supplement: s1 [file s1]

# Molecular characterization of burned organic matter at different soil depths and its relationship with soil water repellency

Mirian de Deus <sup>1</sup>, Ana Z. Miller <sup>2,3</sup> and Nicasio T. Jiménez-Morillo <sup>4,\*</sup>

## Supplementary Material:

**Table S1.** Organic compounds released by analytical pyrolysis for 0–2cm burned soil sample.

| Retention time (min) | Compound name                               | O/C  | H/C  | Relative intensity (%) | Family         |
|----------------------|---------------------------------------------|------|------|------------------------|----------------|
| 2.42                 | Methylamine, <i>N,N</i> -dimethyl           | 0.00 | 3.00 | 2.22                   | Peptide        |
| 2.93                 | 1,3-Cyclopentadiene, methyl-                | 0.00 | 1.33 | 0.68                   | Polysaccharide |
| 3.00                 | Benzene                                     | 0.00 | 1.00 | 0.56                   | Aromatic       |
| 3.10                 | 1-Heptane                                   | 0.00 | 2.29 | 1.31                   | Lipid          |
| 3.51                 | Pyridine                                    | 0.00 | 1.00 | 1.08                   | Peptide        |
| 3.66                 | Toluene                                     | 0.00 | 1.14 | 1.32                   | Aromatic       |
| 3.75                 | 1-Octene                                    | 0.00 | 2.00 | 0.51                   | Lipid          |
| 3.83                 | 1-Pyrrolidineethanamine                     | 0.00 | 2.33 | 0.97                   | Peptide        |
| 4.09                 | Butanoic acid, 3-methyl-                    | 0.40 | 2.00 | 0.29                   | Lipid          |
| 4.16                 | Furan, 2,5-dimethyl-                        | 0.17 | 1.33 | 0.65                   | Polysaccharide |
| 4.24                 | Bicyclo(3.3.1.)non-2-ene                    | 0.00 | 1.56 | 0.50                   | Lipid          |
| 4.44                 | Ethylbenzene                                | 0.00 | 1.25 | 0.46                   | Aromatic       |
| 4.51                 | <i>o</i> -Xylene                            | 0.00 | 1.25 | 0.81                   | Aromatic       |
| 4.61                 | 2-Nonene                                    | 0.00 | 2.00 | 0.42                   | Lipid          |
| 4.75                 | Styrene                                     | 0.00 | 1.00 | 0.98                   | Aromatic       |
| 4.84                 | 2-Cyclopenten-1-one, 2-methyl               | 0.17 | 1.33 | 0.46                   | Polysaccharide |
| 5.08                 | Pyridine, 2,4-dimethyl-                     | 0.00 | 1.29 | 0.24                   | Peptide        |
| 5.43                 | 2-Furancarboxaldehyde, 5-methyl-            | 0.33 | 1.00 | 0.37                   | Polysaccharide |
| 5.47                 | 2-Cyclopenten-1-one, 3-methyl-              | 0.17 | 1.33 | 0.31                   | Polysaccharide |
| 5.53                 | Phenol                                      | 0.17 | 1.00 | 2.02                   | Aromatic       |
| 5.74                 | Benzene, isocyano-                          | 0.00 | 0.71 | 0.45                   | Aromatic       |
| 5.83                 | Benzene, 1,2,4-trimethyl-                   | 0.00 | 1.33 | 0.57                   | Aromatic       |
| 6.08                 | 2-Carene                                    | 0.00 | 1.60 | 0.19                   | Lipid          |
| 6.17                 | <i>p</i> -Cymene                            | 0.00 | 1.40 | 0.61                   | Lipid          |
| 6.28                 | Cyclohexene, 4-methylene-1-(1-methyl-ethyl) | 0.00 | 1.80 | 0.26                   | Lipid          |
| 6.35                 | 2-Cyclopenten-1-one, 2,3-dimethyl           | 0.14 | 1.43 | 0.16                   | Polysaccharide |
| 6.44                 | Phenol, 2-methyl-                           | 0.14 | 1.14 | 0.60                   | Aromatic       |
| 6.55                 | Indene                                      | 0.00 | 0.89 | 0.52                   | PAH            |
| 6.68                 | <i>p</i> -Cresol                            | 0.14 | 1.14 | 1.48                   | Lignin         |
| 6.86                 | 3-Undecene, (Z)-                            | 0.00 | 2.00 | 0.42                   | Lipid          |
| 6.98                 | Phenol, 2-methoxy                           | 0.29 | 1.14 | 0.75                   | Lignin         |
| 7.30                 | 3-Phenyl-2-propyn-1-ol                      | 0.00 | 0.89 | 0.30                   | Aromatic       |
| 7.66                 | Phenol, 2,5-dimethyl-                       | 0.13 | 1.25 | 0.53                   | Aromatic       |
| 7.80                 | Octanoic acid                               | 0.25 | 2.00 | 0.15                   | Lipid          |
| 7.88                 | Phenol, 2-ethyl-                            | 0.13 | 1.25 | 0.72                   | Aromatic       |
| 7.96                 | 1H-Indene, 1-methyl-                        | 0.00 | 1.00 | 0.33                   | PAH            |

|       |                                                                                       |      |      |      |                |
|-------|---------------------------------------------------------------------------------------|------|------|------|----------------|
| 8.15  | 1-Dodecene                                                                            | 0.00 | 2.00 | 0.29 | Lipid          |
| 8.27  | Phenol, 2,4-dimethyl-                                                                 | 0.13 | 1.25 | 0.38 | Lipid          |
| 8.33  | 2-Methoxy-4-methylphenol                                                              | 0.25 | 1.25 | 0.13 | Lignin         |
| 8.42  | Azulene                                                                               | 0.00 | 0.80 | 0.22 | PAH            |
| 8.57  | 2,3-DIHYDRO-BENZOFURAN                                                                | 0.13 | 1.00 | 0.38 | Polysaccharide |
| 8.71  | Benzofuran, 4,7-dimethyl                                                              | 0.10 | 1.00 | 0.24 | Polysaccharide |
| 8.84  | 1,3-Benzenediol, monoacetate                                                          | 0.38 | 1.00 | 0.20 | Aromatic       |
| 9.12  | Phenol, 2,3,5-trimethyl                                                               | 0.11 | 1.33 | 0.28 | Aromatic       |
| 9.29  | Naphthalene, 1,2-dihydro-3-methyl-                                                    | 0.00 | 1.09 | 0.32 | PAH            |
| 9.39  | 1H-Indene, 1,1-dimethyl-                                                              | 0.00 | 1.09 | 0.11 | PAH            |
| 9.48  | 1-Tridecene                                                                           | 0.00 | 2.00 | 0.49 | Lipid          |
| 9.58  | Tridecane                                                                             | 0.00 | 2.15 | 0.22 | Lipid          |
| 9.66  | 1H-Inden-1-one, 2,3-dihydro-                                                          | 0.11 | 0.89 | 0.15 | PAH            |
| 9.78  | Indole                                                                                | 0.00 | 0.88 | 0.30 | Peptide        |
| 9.89  | Naphthalene, 2-methyl-                                                                | 0.00 | 0.91 | 0.27 | PAH            |
| 9.97  | 2-Methoxy-4-vinylphenol                                                               | 0.22 | 1.11 | 0.44 | Lignin         |
| 10.14 | Naphthalene, 2-methyl-                                                                | 0.00 | 0.91 | 0.31 | PAH            |
| 10.41 | Phenol, 2,6-dimethoxy-                                                                | 0.38 | 1.25 | 0.48 | Lignin         |
| 10.54 | Benzaldehyde, 4-propyl                                                                | 0.10 | 1.20 | 0.41 | Aromatic       |
| 10.65 | Benzene, 1-methoxy-4-(1-propenyl)                                                     | 0.10 | 1.20 | 0.20 | Lignin         |
| 10.72 | 1H-Indene, 1,1,3-trimethyl                                                            | 0.00 | 1.17 | 0.15 | PAH            |
| 10.79 | 4-Tetradecene, (E)-                                                                   | 0.00 | 2.00 | 0.37 | Lipid          |
| 10.88 | Tetradecane                                                                           | 0.00 | 2.14 | 0.30 | Lipid          |
| 10.95 | Benzene, 1,3-bis(1-methylethyl)                                                       | 0.00 | 1.50 | 0.99 | Aromatic       |
| 11.14 | Vanillin                                                                              | 0.38 | 1.00 | 0.21 | Lignin         |
| 11.20 | 1,2,3-Trimethylindene                                                                 | 0.00 | 1.17 | 0.68 | PAH            |
| 11.33 | Naphthalene, 2,3-dimethyl                                                             | 0.00 | 1.00 | 0.45 | PAH            |
| 11.41 | Benzene, 2-propenyl-                                                                  | 0.00 | 1.11 | 0.17 | Aromatic       |
| 11.53 | Naphthalene, 1,3-dimethyl-                                                            | 0.00 | 1.00 | 0.95 | PAH            |
| 11.74 | Phenol, 2-methoxy-6-(1-propenyl)                                                      | 0.20 | 1.20 | 0.32 | Lignin         |
| 11.80 | Aromandendrene                                                                        | 0.00 | 1.60 | 1.01 | Lipid          |
| 11.89 | N-Methyl-1-phenylcyclohexylamine                                                      | 0.00 | 1.46 | 0.57 | Peptide        |
| 12.06 | 1-Pentadecene                                                                         | 0.00 | 2.00 | 0.90 | Lipid          |
| 12.14 | Levoglucozan                                                                          | 0.83 | 2.00 | 2.15 | Polysaccharide |
| 12.25 | Acetovanillone                                                                        | 0.33 | 1.33 | 0.88 | Lignin         |
| 12.47 | 1H-Cyclopropa(a)naphthalene,<br>1a,2,3,3a,4,5,6,7b-octahydro-1,1,3a,7-<br>tetramethyl | 0.00 | 1.60 | 1.47 | PAH            |
| 12.57 | alpha-Gurjunene                                                                       | 0.00 | 1.60 | 0.51 | Lipid          |
| 12.61 | Isocaryophyllene                                                                      | 0.00 | 1.71 | 0.59 | Lipid          |
| 12.67 | Aromadendrene, dehydro                                                                | 0.00 | 1.47 | 0.35 | Lipid          |
| 12.72 | 1-Naphthalenol                                                                        | 0.10 | 0.80 | 0.43 | PAH            |
| 12.82 | Benzene,<br>[(tetramethylcyclopropylidene)methyl]                                     | 0.00 | 1.29 | 0.47 | Aromatic       |
| 12.95 | 1,1-Diethylnaphthalene                                                                | 0.00 | 1.14 | 1.15 | PAH            |
| 13.14 | Azulene, 2,4,6-trimethyl-                                                             | 0.00 | 1.08 | 1.18 | PAH            |
| 13.28 | 1-Hexadecene                                                                          | 0.00 | 2.00 | 0.78 | Lipid          |
| 13.33 | Naphthalene, 2,3,6-trimethyl-                                                         | 0.00 | 1.08 | 0.84 | PAH            |
| 13.59 | Himachala-2,4-diene                                                                   | 0.00 | 1.60 | 0.77 | Lipid          |
| 13.67 | 9H-Fluorene                                                                           | 0.00 | 0.77 | 0.39 | PAH            |
| 13.88 | 7-Methyl-1-naphthol                                                                   | 0.09 | 0.91 | 0.58 | PAH            |
| 13.96 | 1-(6-Methoxynaphthalen-2-yl)ethanone                                                  | 0.15 | 0.92 | 0.45 | Lignin         |
| 14.03 | Cycloisolongifolene, 8,9-dehydro                                                      | 0.00 | 1.47 | 0.52 | Lipid          |

|       |                                                                               |      |      |      |          |
|-------|-------------------------------------------------------------------------------|------|------|------|----------|
| 14.15 | Benzene, 1,1'-methylenebis(4-methyl)                                          | 0.00 | 1.07 | 0.76 | Aromatic |
| 14.31 | 7-tert-Butyl-1-naphthol                                                       | 0.07 | 1.14 | 0.56 | PAH      |
| 14.40 | Phenol, 4-(1-methyl-1-phenylethyl)                                            | 0.07 | 1.07 | 0.55 | Aromatic |
| 14.45 | 1-Heptadecene                                                                 | 0.00 | 2.00 | 0.50 | Lipid    |
| 14.52 | Heptadecane                                                                   | 0.00 | 2.12 | 0.66 | Lipid    |
| 14.62 | Naphthalene, 1,6-dimethyl-4-(1-methylethyl)-                                  | 0.00 | 1.20 | 0.60 | PAH      |
| 14.73 | Phenol, 2,6-dimethoxy-4-(2-propenyl)                                          | 0.27 | 1.27 | 0.61 | Lignin   |
| 14.88 | 3-Undecene, 7-methyl-, (Z)-                                                   | 0.00 | 2.00 | 0.94 | Lipid    |
| 14.96 | 1-Octadecene                                                                  | 0.00 | 2.00 | 0.33 | Lipid    |
| 15.13 | Ethanone, 1-(4-hydroxy-3,5-dimethoxyphenyl)                                   | 0.40 | 1.20 | 0.56 | Lignin   |
| 15.20 | Tetradecanoic acid                                                            | 0.14 | 2.00 | 0.72 | Lipid    |
| 15.26 | 2-Mnethyl-octadecyne                                                          | 0.00 | 1.89 | 0.66 | Lipid    |
| 15.37 | Azulene, 7-ethyl-1,4-dimethyl                                                 | 0.22 | 1.13 | 0.64 | PAH      |
| 15.55 | 1-Octadecene                                                                  | 0.00 | 2.00 | 0.52 | Lipid    |
| 15.62 | Octadecane                                                                    | 0.00 | 2.11 | 0.35 | Lipid    |
| 15.83 | Azulene, 1,4-dimethyl-7-(1-methylethyl)-                                      | 0.00 | 1.20 | 0.66 | PAH      |
| 15.89 | 2-(3'-piperidyl)benzimidazole                                                 | 0.00 | 0.75 | 0.65 | Peptide  |
| 16.00 | Phenanthrene                                                                  | 0.00 | 0.71 | 0.61 | PAH      |
| 16.15 | 2-Pentadecanone, 6,10,14-trimethyl                                            | 0.06 | 2.00 | 0.41 | Lipid    |
| 16.43 | 9H-Fluorene, 2,3-dimethyl                                                     | 0.07 | 0.80 | 1.00 | PAH      |
| 16.53 | Benzene, 1,2-dimethyl-4-(phenylmethyl)                                        | 0.00 | 1.00 | 0.61 | Aromatic |
| 16.61 | 1-Nonadecene                                                                  | 0.00 | 2.00 | 0.74 | Lipid    |
| 16.67 | Nonadecane                                                                    | 0.00 | 2.11 | 0.48 | Lipid    |
| 16.75 | 2-Heptadecanone                                                               | 0.06 | 2.00 | 0.65 | Lipid    |
| 17.06 | 1,4-Benzenediamine, N-acetyl-N',N'-diethyl                                    | 0.08 | 1.50 | 0.52 | Peptide  |
| 17.30 | n-Hexadecanoic acid                                                           | 0.13 | 2.00 | 1.25 | Lipid    |
| 17.50 | 3-(2,2-dimethylpropylidene)bicyclo(3.3.1)-nonane-2,4-dione                    | 0.14 | 1.43 | 1.02 | Lipid    |
| 17.62 | 9-Eicosene                                                                    | 0.00 | 2.00 | 0.64 | Lipid    |
| 17.68 | Eicosane                                                                      | 0.00 | 2.10 | 0.44 | Lipid    |
| 18.32 | 2,3,5,6-Detetrahydrocyclohexanone, 2,6-di- <i>t</i> -butyl-4-hydroxymethylene | 0.13 | 1.47 | 0.71 | Lipid    |
| 18.58 | 1-Heneicosene                                                                 | 0.00 | 2.00 | 0.93 | Lipid    |
| 18.64 | Heneicosane                                                                   | 0.00 | 2.10 | 1.17 | Lipid    |
| 19.51 | 1-Docosene                                                                    | 0.00 | 2.00 | 2.37 | Lipid    |
| 19.55 | Docosane                                                                      | 0.00 | 2.09 | 0.99 | Lipid    |
| 19.75 | Behenic alcohol                                                               | 0.05 | 2.09 | 0.60 | Lipid    |
| 19.83 | 3-Pyrrolidino-3-oxo-propylsuccinimide                                         | 0.27 | 1.45 | 0.52 | Peptide  |
| 20.39 | 1-Tricosene                                                                   | 0.00 | 2.00 | 1.18 | Lipid    |
| 20.43 | Tricosane                                                                     | 0.00 | 2.09 | 0.65 | Lipid    |
| 21.24 | 1-Tetracosene                                                                 | 0.00 | 2.00 | 2.30 | Lipid    |
| 21.41 | 2-Nonadecanone                                                                | 0.05 | 2.00 | 0.67 | Lipid    |
| 22.08 | 1-Pentacosene                                                                 | 0.00 | 2.00 | 3.07 | Lipid    |
| 22.30 | 17-Octadecenoic acid, methyl ester                                            | 0.11 | 1.89 | 1.77 | Lipid    |
| 22.85 | 1-Hexacosene                                                                  | 0.00 | 2.00 | 2.55 | Lipid    |
| 22.97 | Hexacosane                                                                    | 0.00 | 2.08 | 0.66 | Lipid    |
| 23.75 | 1-Heptacosene                                                                 | 0.00 | 2.00 | 2.33 | Lipid    |
| 24.02 | Tetracosanoic acid, methyl ester                                              | 0.08 | 2.00 | 1.07 | Lipid    |
| 24.65 | 1-Octacosene                                                                  | 0.00 | 2.00 | 1.75 | Lipid    |
| 25.79 | 1-Nonacosene                                                                  | 0.00 | 2.00 | 0.85 | Lipid    |
| 25.89 | Nonacosane                                                                    | 0.00 | 2.07 | 0.71 | Lipid    |

|       |                                                  |      |      |      |         |
|-------|--------------------------------------------------|------|------|------|---------|
| 27.06 | 1-Triacontene                                    | 0.00 | 2.00 | 0.95 | Lipid   |
| 28.50 | 1-Henetriacontene                                | 0.06 | 2.00 | 0.58 | Lipid   |
| 28.85 | Anthracene, 9,10-bis(2-methoxyphenyl)            | 0.07 | 0.79 | 0.77 | PAH     |
| 29.01 | 17-Androstanone, 1-(3,4-dimethylphenyl)-1-methyl | 0.04 | 1.43 | 0.36 | Sterane |
| 29.19 | Clionasterol                                     | 0.03 | 1.72 | 0.38 | Sterane |
| 29.83 | Stigmastan-3,5-diene                             | 0.00 | 1.66 | 0.88 | Sterane |

PAH = Polycyclic Aromatic Hydrocarbon

**Table S2.** Organic compounds released by analytical pyrolysis for 2–5cm burned soil sample

| Retention time (min) | Compound name                                      | O/C  | H/C  | Relative intensity (%) | Family         |
|----------------------|----------------------------------------------------|------|------|------------------------|----------------|
| 2.65                 | Methylamine, <i>N,N</i> -dimethyl-                 | 0.00 | 3.00 | 14.95                  | Peptide        |
| 2.70                 | Furan, 2-methyl                                    | 0.20 | 1.20 | 4.02                   | Polysaccharide |
| 3.01                 | Benzene                                            | 0.00 | 1.00 | 7.78                   | Aromatic       |
| 3.53                 | Pyridine                                           | 0.00 | 1.00 | 3.79                   | Peptide        |
| 3.67                 | Toluene                                            | 0.00 | 1.14 | 6.26                   | Aromatic       |
| 4.17                 | Furfural                                           | 0.40 | 0.80 | 5.36                   | Polysaccharide |
| 4.45                 | Benzene, ethyl                                     | 0.00 | 1.25 | 0.97                   | Aromatic       |
| 4.52                 | <i>o</i> -Xylene                                   | 0.00 | 1.25 | 2.87                   | Aromatic       |
| 4.62                 | 1-Nonene                                           | 0.00 | 2.00 | 1.16                   | Lipid          |
| 4.75                 | Benzene, 1,3-dimethyl                              | 0.00 | 1.25 | 2.68                   | Aromatic       |
| 5.45                 | 2-Furancarboxaldehyde, 5-methyl-                   | 0.33 | 1.00 | 1.00                   | Polysaccharide |
| 5.48                 | Benzaldehyde                                       | 0.14 | 0.86 | 1.16                   | Lipid          |
| 5.54                 | Phenol                                             | 0.17 | 1.00 | 2.86                   | Aromatic       |
| 5.74                 | Benzonitrile                                       | 0.00 | 0.71 | 1.72                   | N-comp         |
| 5.84                 | Benzene, 1,2,4-trimethyl-                          | 0.00 | 1.33 | 1.52                   | Aromatic       |
| 5.92                 | Benzofuran                                         | 0.13 | 0.75 | 1.29                   | Polysaccharide |
| 6.19                 | <i>p</i> -Cymene                                   | 0.00 | 1.40 | 2.60                   | Aromatic       |
| 6.69                 | Phenol, 3-methyl-                                  | 0.14 | 1.14 | 0.87                   | Aromatic       |
| 6.72                 | Ethanone, 1-phenyl-                                | 0.13 | 1.00 | 0.71                   | Aromatic       |
| 7.89                 | Phenol, 3-ethyl-                                   | 0.13 | 1.25 | 0.90                   | Aromatic       |
| 8.43                 | Azulene                                            | 0.00 | 0.80 | 1.49                   | PAH            |
| 9.90                 | Naphthalene, 1-methyl-                             | 0.00 | 0.91 | 1.08                   | PAH            |
| 10.79                | 1-Tetradecene                                      | 0.00 | 2.00 | 0.46                   | Lipid          |
| 10.96                | Biphenyl                                           | 0.00 | 0.83 | 0.63                   | PAH            |
| 11.60                | Naphthalene, 2,7-dimethyl-                         | 0.00 | 1.00 | 0.84                   | PAH            |
| 12.06                | 1-Pentadecene                                      | 0.00 | 2.00 | 0.89                   | Lipid          |
| 12.15                | Pentadecene                                        | 0.00 | 2.13 | 0.46                   | Lipid          |
| 12.36                | Naphthalene,1,2,3,4-tetrahydro-2,2,5,7-tetramethyl | 0.00 | 1.43 | 0.48                   | PAH            |
| 12.43                | 2H-Inden-2-one,1,3-dihydro-1,1,3,3-tetramethyl-    | 0.08 | 1.23 | 0.61                   | PAH            |
| 12.77                | 1S, <i>Cis</i> -calamenene                         | 0.00 | 1.47 | 0.78                   | Aromatic       |
| 12.83                | Dibenzofuran                                       | 0.08 | 0.67 | 0.88                   | Polysaccharide |
| 13.18                | Benzene, nonyl                                     | 0.00 | 1.60 | 0.85                   | Aromatic       |
| 13.29                | 7-Hexadecene, (Z)-                                 | 0.00 | 2.00 | 0.69                   | Lipid          |
| 13.34                | Hexadecane                                         | 0.00 | 2.13 | 1.50                   | Lipid          |
| 14.45                | 1-Heptadecene                                      | 0.00 | 2.00 | 0.53                   | Lipid          |
| 14.53                | Heptadecane                                        | 0.00 | 2.12 | 0.58                   | Lipid          |
| 14.63                | Naphthalene, 1,6-dimethyl-4-(1-methylethyl)-       | 0.00 | 1.20 | 1.74                   | Aromatic       |

|       |                                |      |      |      |        |
|-------|--------------------------------|------|------|------|--------|
| 14.88 | 1-Octadecene                   | 0.00 | 2.00 | 0.52 | Lipid  |
| 15.01 | 3-Undecene, 2-methyl           | 0.00 | 2.00 | 0.52 | Lipid  |
| 15.40 | 1,4,5,8-Tetramethylnaphthalene | 0.00 | 1.14 | 0.58 | PAH    |
| 15.51 | 9H-Fluoren-9-one               | 0.08 | 0.62 | 0.64 | PAH    |
| 15.56 | 1-Nonadecene                   | 0.00 | 2.00 | 0.60 | Lipid  |
| 16.01 | 9H-Fluorene, 9-methylene-      | 0.00 | 0.71 | 0.53 | PAH    |
| 16.62 | 1-Eicosene                     | 0.00 | 2.00 | 0.40 | Lipid  |
| 16.67 | Eicosane                       | 0.00 | 2.10 | 0.36 | Lipid  |
| 16.75 | Hexadecanenitrile              | 0.00 | 1.94 | 0.91 | N-comp |
| 17.62 | 1-Heneicosene                  | 0.00 | 2.00 | 0.41 | Lipid  |
| 17.68 | Heneicosane                    | 0.00 | 2.10 | 0.11 | Lipid  |
| 18.59 | 1-Docosene                     | 0.00 | 2.00 | 0.64 | Lipid  |
| 18.64 | Docosane                       | 0.00 | 2.09 | 0.49 | Lipid  |
| 19.51 | 1-Tricosene                    | 0.00 | 2.00 | 3.84 | Lipid  |
| 19.56 | Tricosane                      | 0.00 | 2.09 | 0.77 | Lipid  |
| 19.59 | Tricosane                      | 0.00 | 2.09 | 1.16 | Lipid  |
| 20.39 | 1-Tetracosene                  | 0.00 | 2.00 | 0.92 | Lipid  |
| 20.43 | Tetracosane                    | 0.00 | 2.08 | 0.59 | Lipid  |
| 21.24 | 1-Pentacosene                  | 0.00 | 2.00 | 2.45 | Lipid  |
| 21.31 | Pentacosane                    | 0.00 | 2.08 | 0.48 | Lipid  |
| 21.48 | 13-Methyl-Z-14-nonacosene      | 0.00 | 2.00 | 0.48 | Lipid  |
| 22.09 | 1-Hexacosene                   | 0.00 | 2.00 | 1.17 | Lipid  |
| 22.31 | Nitrile                        | 0.00 | 1.94 | 0.91 | N-comp |
| 22.85 | 1-Heptacosene                  | 0.00 | 2.00 | 1.03 | Lipid  |
| 22.91 | Heptacosane                    | 0.00 | 2.07 | 0.55 | Lipid  |

PAH = Polycyclic Aromatic Hydrocarbon; N-comp = Nitrogen compounds.
